# Supplementary material
Source: bioRxiv or medRxiv preprint supplement (https://www.medrxiv.org/highwire/filestream/87574/field_highwire_adjunct_files/0/2020.06.27.20141382-1.pdf)
Supplement: Supplementary file [file 2020.06.27.20141382-1.pdf]

The epidemiology of autoimmune liver disease  
varies with geographic latitude

Gwilym J Webb<sup>1,2</sup>, Ronan P Ryan<sup>3</sup>, Tom P Marshall<sup>3</sup>, and  
Gideon M Hirschfield<sup>1,2,4</sup>

<sup>1</sup>National Institute for Health Research (NIHR) Birmingham Biomedical Research  
Centre (BRC), University of Birmingham, UK

<sup>2</sup>Institute of Translational Medicine, Birmingham Health Partners,  
University Hospitals Birmingham NHS Trust, UK

<sup>3</sup>Primary Care Clinical Sciences, Institute of Applied Health Research,  
University of Birmingham, UK

<sup>4</sup>Toronto Centre for Liver Disease, Ontario, Canada

## Supplementary figures

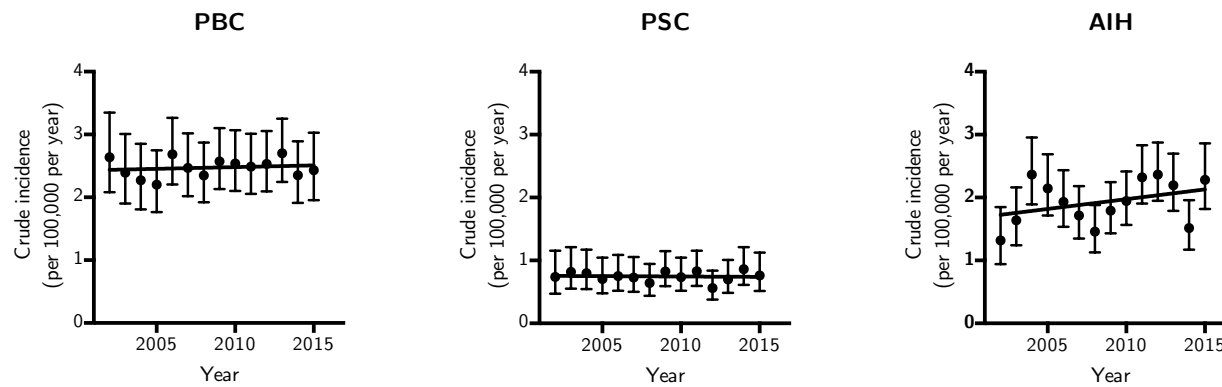

Figure S1: Crude incidence per 100 000 per year of autoimmune liver disease over the study period. There was no significant change for any of the diseases over the study period. For PBC,  $0.01(-0.02 \text{ to } 0.03)/100\,000/\text{year}/\text{year}$ ;  $r^2=0.023$ ;  $p=0.693$ . For PSC,  $0.00(-0.01 \text{ to } 0.01)/100\,000/\text{year}/\text{year}$ ;  $r^2=0.004$ ;  $p=0.837$ . For AIH,  $0.03(-0.02 \text{ to } 0.08)/100\,000/\text{year}/\text{year}$ ;  $r^2=0.130$ ;  $p=0.205$ .

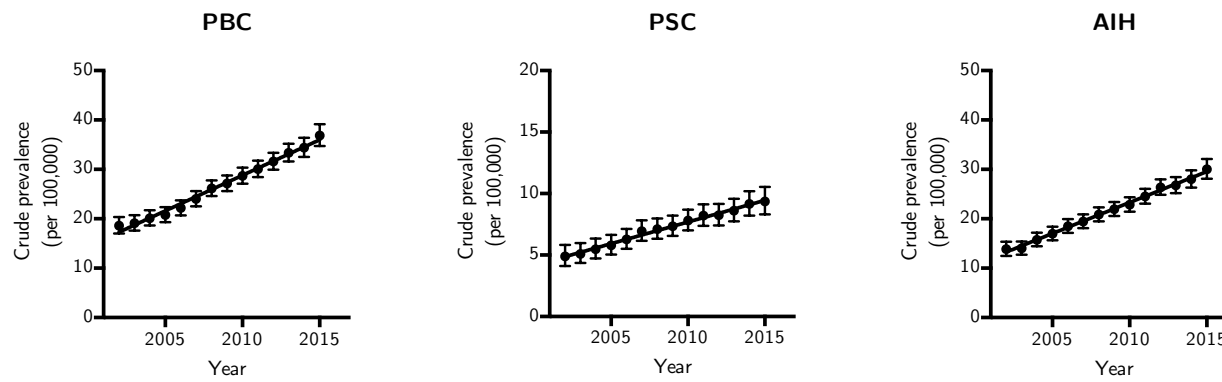

Figure S2: Crude prevalence per 100 000 over time at year end for each year of the study period. Prevalence increased over the study period for each of the autoimmune liver diseases. For PBC, there was an increase of 1.44(1.35-1.53)/100 000/year,  $r^2=0.991$ ,  $p<0.001$ ; PSC, there was an increase of 0.35(0.33-37)/100 000/year,  $r^2=0.991$ ,  $p<0.001$ ; For AIH, there was an increase of 1.26(1.20-1.31)/100 000/year,  $r^2=0.996$ ,  $p<0.001$

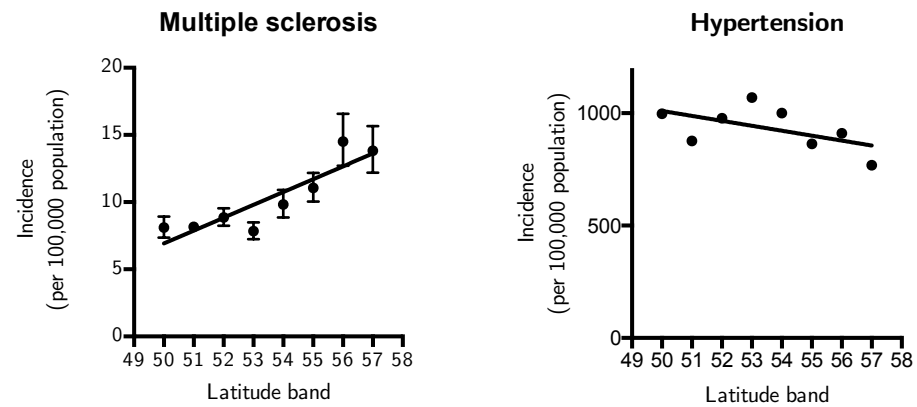

Figure S3: Incidence of multiple sclerosis and hypertension by latitude band. Figures presented are after adjustment for variations in sex, age, deprivation score, and smoking status. For multiple sclerosis, a significant positive correlation was present at  $0.657(0.249 \text{ to } 1.065)/100\,000/\text{degree}$ ;  $r^2=0.721$ ;  $p=0.008$ . For hypertension, no significant correlation was present at  $-5.02(-30.27 \text{ to } 20.23)$ ;  $r^2=0.038$ ;  $p=0.644$ .

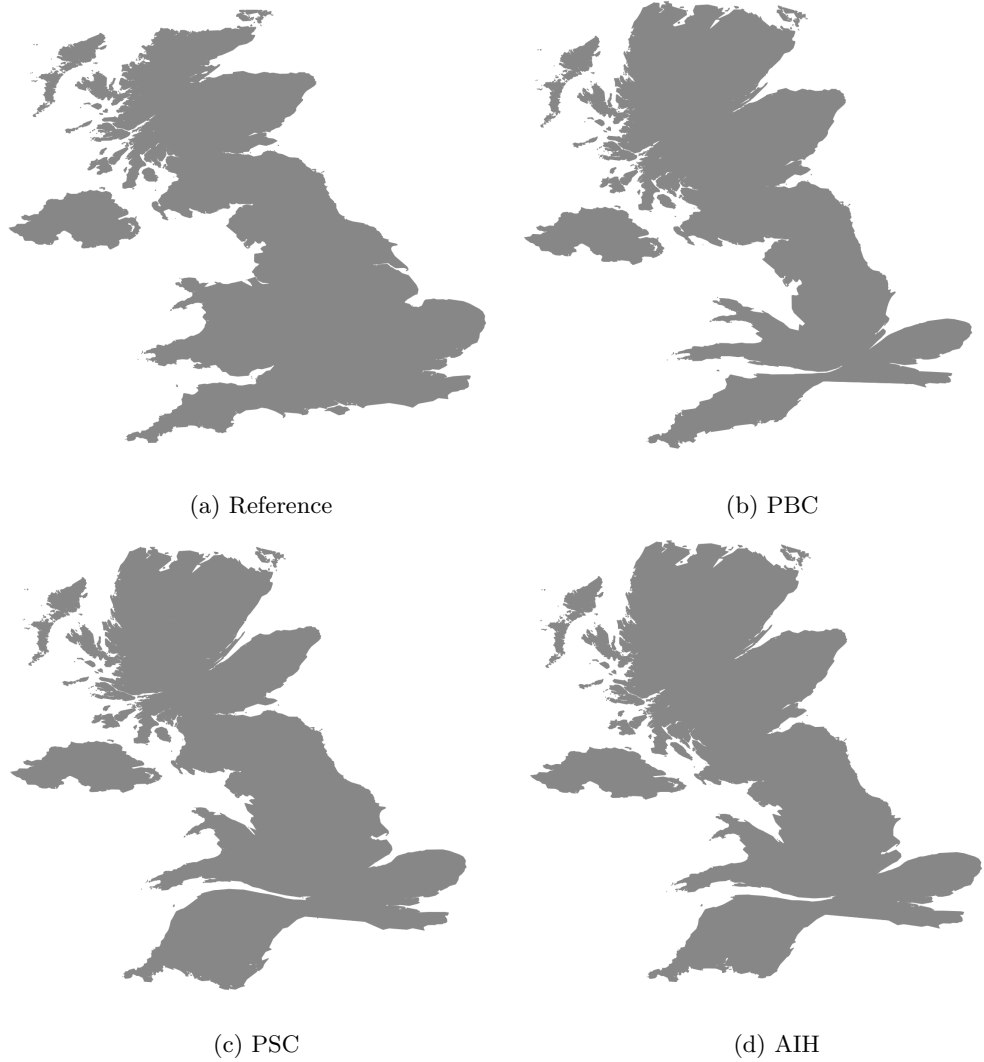

Figure S4: Cartograms depicting area-proportionate resizing of latitude bands by crude incidence for autoimmune liver diseases

## Supplementary Tables

| <b>Disease</b>                 | <b>Code</b> | <b>Description</b>                            |
|--------------------------------|-------------|-----------------------------------------------|
| Primary biliary cholangitis    | J616000     | Primary biliary cirrhosis                     |
| Primary sclerosing cholangitis | J661700     | Primary sclerosing cholangitis                |
| Autoimmune hepatitis           | J661700     | Chronic active hepatitis                      |
|                                | J614111     | Autoimmune chronic active hepatitis           |
|                                | J63B.00     | Autoimmune hepatitis                          |
| Multiple sclerosis             | F20..00     | Multiple sclerosis                            |
|                                | F20..11     | Disseminated sclerosis                        |
|                                | F200.00     | Multiple sclerosis of the brain stem          |
|                                | F201.00     | Multiple sclerosis of the spinal cord         |
|                                | F202.00     | Generalised multiple sclerosis                |
|                                | F203.00     | Exacerbation of multiple sclerosis            |
|                                | F204.00     | Benign multiple sclerosis                     |
|                                | F205.00     | Malignant multiple sclerosis                  |
|                                | F206.00     | Primary progressive multiple sclerosis        |
|                                | F207.00     | Relapsing and remitting multiple sclerosis    |
|                                | F208.00     | Secondary progressive multiple sclerosis      |
|                                | F20z.00     | Multiple sclerosis NOS                        |
| Hypertension                   | G24..00     | Secondary hypertension                        |
|                                | G240.00     | Secondary malignant hypertension              |
|                                | G240z00     | Secondary malignant hypertension NOS          |
|                                | G241.00     | Secondary benign hypertension                 |
|                                | G241z00     | Secondary benign hypertension NOS             |
|                                | G244.00     | Hypertension secondary to endocrine disorders |
|                                | G24z.00     | Secondary hypertension NOS                    |
|                                | G24z000     | Secondary renovascular hypertension NOS       |



|         |                                                              |
|---------|--------------------------------------------------------------|
| G24zz00 | Secondary hypertension NOS                                   |
| G25..00 | Stage 1 hypertension (NICE - Nat Ins for Hth Clin Excl 2011) |
| G25..11 | Stage 1 hypertension                                         |
| G250.00 | Stage 1 hyperten (NICE 2011) without evidnce end organ dange |
| G251.00 | Stage 1 hyperten (NICE 2011) with evidnce end organ dange    |
| G26..00 | Severe hypertension (Nat Inst for Health Clinical Ex 2011)   |
| G26..11 | Severe hypertension                                          |
| G28..00 | Stage 2 hypertension (NICE - Nat Ins for Hth Clin Excl 2011) |
| G2y..00 | Other specified hypertensive disease                         |
| G2z..00 | Hypertensive disease NOS                                     |
| Gyu2.00 | [X]Hypertensive diseases                                     |

---

Table S1: Diagnostic codes used in study.

| Category                             | Subcategory    | PBC incidence (/100 000/year) |                  |                  | PSC incidence (/100 000/year) |                  |                  | AIH incidence (/100 000/year) |                  |                  |
|--------------------------------------|----------------|-------------------------------|------------------|------------------|-------------------------------|------------------|------------------|-------------------------------|------------------|------------------|
|                                      |                | n                             | Crude            | Adjusted         | n                             | Crude            | Adjusted         | n                             | Crude            | Adjusted         |
| <b>Population</b>                    | -              | 1314                          | 2.47 (2.34-2.60) | 2.47 (2.33-2.60) | 396                           | 0.74 (0.67-0.82) | 0.74 (0.67-0.82) | 1034                          | 1.94 (1.83-2.06) | 1.95 (1.83-2.07) |
| <b>Latitude</b>                      | 50°-           | 111                           | 2.16 (1.79-2.60) | 1.96 (1.57-2.34) | 42                            | 0.82 (0.60-1.11) | 0.76 (0.52-1.00) | 103                           | 2.00 (1.65-2.43) | 1.80 (1.44-2.17) |
|                                      | 51°-           | 373                           | 1.75 (1.58-1.94) | 1.86 (1.67-2.06) | 135                           | 0.63 (0.54-0.75) | 0.65 (0.54-0.75) | 359                           | 1.68 (1.52-1.87) | 1.75 (1.57-1.93) |
|                                      | 52°-           | 135                           | 1.67 (1.41-1.98) | 1.75 (1.45-2.05) | 68                            | 0.84 (0.66-1.07) | 0.84 (0.64-1.05) | 142                           | 1.76 (1.49-2.07) | 1.76 (1.46-2.05) |
|                                      | 53°-           | 220                           | 2.81 (2.46-3.21) | 2.76 (2.40-3.13) | 60                            | 0.77 (0.59-0.99) | 0.75 (0.56-0.94) | 157                           | 2.00 (1.71-2.34) | 1.97 (1.66-2.28) |
|                                      | 54°-           | 161                           | 4.49 (3.85-5.24) | 4.35 (3.66-5.05) | 29                            | 0.81 (0.56-1.16) | 0.80 (0.50-1.10) | 79                            | 2.20 (1.77-2.75) | 2.18 (1.68-2.67) |
|                                      | 55°-           | 151                           | 4.02 (3.43-4.72) | 4.06 (3.31-4.80) | 33                            | 0.88 (0.63-1.24) | 0.89 (0.56-1.22) | 88                            | 2.35 (1.90-2.89) | 2.35 (1.77-2.92) |
|                                      | 56°-           | 70                            | 4.65 (3.68-5.87) | 4.19 (3.13-5.25) | 9                             | 0.60 (0.31-1.15) | 0.52 (0.18-0.86) | 45                            | 2.99 (2.23-4.00) | 2.45 (1.69-3.22) |
|                                      | 57°-           | 86                            | 4.86 (3.93-6.00) | 4.55 (3.52-5.58) | 18                            | 1.02 (0.64-1.61) | 0.98 (0.50-1.46) | 58                            | 3.28 (2.53-4.24) | 3.06 (2.18-3.93) |
|                                      | Missing        | 7                             | 2.37 (1.13-4.97) | 2.36 (0.57-4.15) | 2                             | 0.68 (0.17-2.70) | 0.56 (0.00-1.33) | 3                             | 1.01 (0.33-3.15) | 0.73 (0.00-1.57) |
| <b>Sex</b>                           | Male           | 173                           | 0.65 (0.56-0.76) | 0.66 (0.56-0.76) | 230                           | 0.87 (0.76-0.99) | 0.91 (0.79-1.03) | 241                           | 0.91 (0.80-1.03) | 0.94 (0.82-1.06) |
|                                      | Female         | 1141                          | 4.27 (4.03-4.52) | 4.24 (3.99-4.49) | 166                           | 0.62 (0.53-0.72) | 0.59 (0.50-0.68) | 793                           | 2.96 (2.77-3.18) | 2.92 (2.72-3.13) |
| <b>Age</b>                           | 0-9.9          | 0                             | 0.00 (0.00-0.00) | 0.00 (0.00-0.00) | 2                             | 0.04 (0.01-0.16) | 0.00 (0.00-0.00) | 7                             | 0.14 (0.06-0.28) | 0.12 (0.00-0.26) |
|                                      | 10-19.9        | 1                             | 0.02 (0.00-0.12) | 0.01 (0.00-0.02) | 21                            | 0.35 (0.23-0.54) | 0.03 (0.01-0.04) | 55                            | 0.92 (0.71-1.20) | 0.93 (0.54-1.32) |
|                                      | 20-29.9        | 5                             | 0.08 (0.03-0.20) | 0.07 (0.01-0.13) | 34                            | 0.56 (0.40-0.78) | 0.05 (0.03-0.07) | 48                            | 0.78 (0.59-1.04) | 0.62 (0.44-0.81) |
|                                      | 30-39.9        | 59                            | 0.80 (0.62-1.03) | 0.71 (0.52-0.90) | 28                            | 0.38 (0.26-0.55) | 0.03 (0.02-0.05) | 87                            | 1.18 (0.96-1.46) | 1.10 (0.87-1.34) |
|                                      | 40-49.9        | 181                           | 2.18 (1.88-2.52) | 1.94 (1.65-2.23) | 68                            | 0.82 (0.65-1.04) | 0.08 (0.06-0.10) | 132                           | 1.59 (1.34-1.88) | 1.45 (1.20-1.70) |
|                                      | 50-59.9        | 318                           | 4.34 (3.89-4.84) | 4.10 (3.52-4.68) | 61                            | 0.83 (0.65-1.07) | 0.08 (0.06-0.10) | 221                           | 3.02 (2.64-3.44) | 2.70 (2.34-3.07) |
|                                      | 60-69.9        | 353                           | 5.80 (5.23-6.44) | 5.08 (4.53-5.63) | 87                            | 1.43 (1.16-1.76) | 0.14 (0.10-0.17) | 239                           | 3.93 (3.46-4.46) | 3.68 (3.13-4.23) |
|                                      | 70-79.9        | 277                           | 6.62 (5.88-7.44) | 6.22 (5.20-7.25) | 65                            | 1.55 (1.22-1.98) | 0.15 (0.10-0.19) | 181                           | 4.32 (3.74-5.00) | 3.72 (3.15-4.29) |
|                                      | 80-89.9        | 111                           | 4.93 (4.10-5.94) | 4.28 (3.20-5.36) | 28                            | 1.24 (0.86-1.80) | 0.09 (0.05-0.13) | 61                            | 2.71 (2.11-3.48) | 2.34 (1.67-3.00) |
|                                      | 90+            | 9                             | 1.94 (1.01-3.73) | 1.21 (0.38-2.05) | 2                             | 0.43 (0.11-1.72) | 0.02 (0.00-0.05) | 3                             | 0.65 (0.21-2.01) | 0.71 (0.00-1.65) |
| <b>Townsend deprivation quintile</b> | 1 – least      | 268                           | 2.04 (1.81-2.30) | 2.21 (1.91-2.51) | 99                            | 0.75 (0.62-0.92) | 0.67 (0.53-0.81) | 242                           | 1.84 (1.62-2.09) | 1.85 (1.59-2.11) |
|                                      | 2              | 287                           | 2.55 (2.27-2.87) | 2.43 (2.14-2.72) | 88                            | 0.78 (0.64-0.96) | 0.74 (0.58-0.91) | 225                           | 2.00 (1.76-2.28) | 1.90 (1.65-2.16) |
|                                      | 3              | 282                           | 2.59 (2.31-2.92) | 2.60 (2.29-2.91) | 87                            | 0.80 (0.65-0.99) | 0.81 (0.64-0.98) | 219                           | 2.01 (1.76-2.30) | 2.02 (1.75-2.29) |
|                                      | 4              | 244                           | 2.59 (2.28-2.94) | 2.62 (2.28-2.96) | 69                            | 0.73 (0.58-0.93) | 0.80 (0.61-1.00) | 175                           | 1.86 (1.60-2.15) | 1.95 (1.65-2.25) |
|                                      | 5 – most       | 187                           | 2.83 (2.45-3.26) | 2.82 (2.35-3.28) | 39                            | 0.59 (0.43-0.81) | 0.73 (0.46-0.99) | 141                           | 2.13 (1.81-2.51) | 2.25 (1.82-2.67) |
|                                      | Missing        | 46                            | 2.32 (1.74-3.09) | 2.86 (1.93-3.79) | 14                            | 0.71 (0.42-1.19) | 0.75 (0.35-1.15) | 32                            | 1.61 (1.14-2.28) | 1.76 (1.06-2.45) |
| <b>Smoking</b>                       | Current smoker | 400                           | 3.62 (3.28-3.99) | 3.40 (3.03-3.77) | 54                            | 0.49 (0.37-0.64) | 0.47 (0.33-0.61) | 256                           | 2.31 (2.05-2.62) | 2.24 (1.94-2.55) |
|                                      | Ex-smoker      | 308                           | 4.22 (3.78-4.72) | 2.93 (2.58-3.27) | 69                            | 0.95 (0.75-1.20) | 0.61 (0.45-0.77) | 185                           | 2.54 (2.20-2.93) | 1.98 (1.54-2.42) |
|                                      | Never smoked   | 596                           | 2.18 (2.01-2.36) | 1.96 (1.80-2.12) | 265                           | 0.97 (0.86-1.09) | 0.95 (0.83-1.07) | 578                           | 2.11 (1.95-2.29) | 1.96 (1.79-2.12) |
|                                      | Missing        | 10                            | 0.13 (0.07-0.25) | 0.87 (0.17-1.57) | 8                             | 0.11 (0.05-0.21) | 0.26 (0.00-0.56) | 15                            | 0.20 (0.12-0.33) | 0.30 (0.00-0.64) |
| <b>Ethnicity</b>                     | Asian          | 15                            | 1.30 (0.79-2.16) | -                | 7                             | 0.61 (0.29-1.28) | -                | 20                            | 1.74 (1.12-2.69) | -                |
|                                      | Black          | 8                             | 1.41 (0.71-2.83) | -                | 2                             | 0.35 (0.09-1.41) | -                | 13                            | 2.30 (1.33-3.95) | -                |
|                                      | Mixed          | 3                             | 1.41 (0.45-4.37) | -                | 1                             | 0.47 (0.07-3.33) | -                | 2                             | 0.94 (0.23-3.75) | -                |
|                                      | Other          | 3                             | 1.21 (0.39-3.76) | -                | 1                             | 0.40 (0.06-2.87) | -                | 1                             | 0.40 (0.06-2.87) | -                |
|                                      | White          | 545                           | 2.85 (2.62-3.10) | -                | 163                           | 0.85 (0.73-0.99) | -                | 393                           | 2.05 (1.86-2.27) | -                |
|                                      | Missing        | 740                           | 2.32 (2.15-2.49) | -                | 222                           | 0.69 (0.61-0.79) | -                | 605                           | 1.89 (1.75-2.05) | -                |

Table S2: Incidence of primary biliary cholangitis (PBC), primary sclerosing cholangitis (PSC), and autoimmune hepatitis (AIH) for the time period 2002-01-01 to 2016-05-10. ‘Adjusted’ figures are adjusted for one or all of latitude, sex, age, Townsend deprivation quintile, and smoking status by direct standardisation as appropriate. Figures are per 100 000 population/year with 95% confidence intervals.

| Category                             | Subcategory    | PBC prevalence (/100 000) |                        |                       | PSC prevalence (/100 000) |                     |                     | AIH prevalence (/100 000) |                     |                     |
|--------------------------------------|----------------|---------------------------|------------------------|-----------------------|---------------------------|---------------------|---------------------|---------------------------|---------------------|---------------------|
|                                      |                | n                         | Crude                  | Adjusted              | n                         | Crude               | Adjusted            | n                         | Crude               | Adjusted            |
| <b>Population</b>                    | -              | 1299                      | 39.62 (37.52-41.83)    | 39.62 (37.50-41.74)   | 353                       | 10.77 (9.70-11.95)  | 10.77 (9.65-11.88)  | 1116                      | 34.04 (32.10-36.10) | 34.04 (32.06-36.02) |
| <b>Latitude</b>                      | 50°-           | 83                        | 33.45 (26.97-41.47)    | 28.16 (21.88-34.44)   | 27                        | 10.88 (7.46-15.86)  | 9.71 (5.87-13.55)   | 93                        | 37.47 (30.58-45.92) | 32.19 (25.38-39.00) |
|                                      | 51°-           | 381                       | 28.50 (25.78-31.51)    | 30.59 (27.50-33.69)   | 141                       | 10.55 (8.94-12.44)  | 10.61 (8.84-12.38)  | 382                       | 28.57 (25.85-31.59) | 29.78 (26.76-32.79) |
|                                      | 52°-           | 84                        | 27.37 (22.10-33.90)    | 27.29 (21.44-33.15)   | 30                        | 9.77 (6.83-13.98)   | 9.90 (6.29-13.50)   | 88                        | 28.67 (23.27-35.34) | 29.00 (22.89-35.10) |
|                                      | 53°-           | 161                       | 43.34 (37.13-50.58)    | 42.01 (35.51-48.51)   | 34                        | 9.15 (6.54-12.81)   | 8.55 (5.64-11.45)   | 143                       | 38.49 (32.67-45.35) | 37.20 (31.04-43.37) |
|                                      | 54°-           | 153                       | 64.94 (55.43-76.09)    | 63.86 (53.70-74.02)   | 27                        | 11.46 (7.86-16.71)  | 11.41 (7.09-15.74)  | 98                        | 41.60 (34.13-50.71) | 42.69 (34.10-51.30) |
|                                      | 55°-           | 195                       | 49.09 (42.66-56.48)    | 49.79 (42.02-57.56)   | 40                        | 10.07 (7.39-13.75)  | 10.46 (7.01-13.91)  | 148                       | 37.25 (31.71-43.77) | 40.47 (33.02-47.93) |
|                                      | 56°-           | 103                       | 66.37 (54.71-80.51)    | 60.95 (48.53-73.36)   | 18                        | 11.60 (7.31-18.41)  | 10.63 (5.67-15.58)  | 71                        | 45.75 (36.25-57.73) | 41.00 (31.17-50.82) |
|                                      | 57°-           | 129                       | 64.70 (54.44-76.88)    | 61.08 (50.11-72.05)   | 34                        | 17.05 (12.18-23.87) | 16.70 (10.77-22.63) | 88                        | 44.14 (35.81-54.39) | 39.11 (30.44-47.78) |
|                                      |                | 10                        | 36.04 (19.39-66.99)    | 37.40 (15.06-59.74)   | 2                         | 7.21 (1.80-28.82)   | 8.51 (0.00-19.85)   | 5                         | 18.02 (7.50-43.30)  | 18.50 (3.98-33.03)  |
| <b>Sex</b>                           | Male           | 143                       | 8.80 (7.47-10.36)      | 8.82 (7.37-10.28)     | 205                       | 12.61 (11.00-14.46) | 13.25 (11.43-15.07) | 283                       | 17.41 (15.50-19.56) | 17.93 (15.83-20.04) |
|                                      | Female         | 1156                      | 69.92 (66.00-74.07)    | 69.35 (65.36-73.33)   | 148                       | 8.95 (7.62-10.52)   | 8.69 (7.28-10.09)   | 833                       | 50.38 (47.08-53.93) | 50.36 (46.92-53.79) |
| <b>Age</b>                           | 0-9.9          | 0                         | 0.00 (0.00-0.00)       | 0.00 (0.00-0.00)      | 1                         | 0.30 (0.04-2.15)    | 0.06 (0.00-0.18)    | 2                         | 0.61 (0.15-2.42)    | 2.55 (0.00-7.43)    |
|                                      | 10-19.9        | 0                         | 0.00 (0.00-0.00)       | 0.00 (0.00-0.00)      | 11                        | 2.95 (1.64-5.33)    | 3.64 (1.40-5.89)    | 28                        | 7.52 (5.19-10.89)   | 9.02 (4.34-13.68)   |
|                                      | 20-29.9        | 2                         | 0.52 (0.13-2.08)       | 0.77 (0.00-1.95)      | 33                        | 8.60 (6.11-12.10)   | 7.23 (4.14-10.32)   | 67                        | 17.40 (13.74-22.18) | 16.74 (10.76-22.71) |
|                                      | 30-39.9        | 31                        | 7.37 (5.18-10.48)      | 5.88 (3.78-7.98)      | 42                        | 9.98 (7.38-13.51)   | 8.30 (5.72-10.88)   | 82                        | 19.49 (15.70-24.20) | 23.58 (14.76-32.40) |
|                                      | 40-49.9        | 121                       | 25.33 (21.20-30.27)    | 21.04 (17.27-24.82)   | 44                        | 9.21 (6.86-12.38)   | 9.09 (5.44-12.73)   | 132                       | 27.64 (23.30-32.78) | 28.08 (18.51-37.65) |
|                                      | 50-59.9        | 260                       | 55.21 (48.89-62.35)    | 52.81 (41.85-63.77)   | 67                        | 14.23 (11.20-18.08) | 12.34 (9.36-15.32)  | 201                       | 42.68 (37.17-49.01) | 35.66 (30.68-40.65) |
|                                      | 60-69.9        | 363                       | 93.82 (84.65-103.98)   | 84.44 (70.06-98.82)   | 73                        | 18.87 (15.00-23.73) | 15.81 (12.07-19.55) | 279                       | 72.11 (64.12-81.09) | 68.96 (55.14-82.77) |
|                                      | 70-79.9        | 344                       | 129.23 (116.27-143.63) | 100.97 (89.93-112.02) | 54                        | 20.29 (15.54-26.49) | 19.14 (12.56-25.72) | 221                       | 83.02 (72.77-94.72) | 66.06 (56.93-75.20) |
|                                      | 80-89.9        | 163                       | 117.21 (100.53-136.66) | 84.97 (70.48-99.46)   | 26                        | 18.70 (12.73-27.46) | 12.41 (7.34-17.49)  | 97                        | 69.75 (57.16-85.11) | 57.29 (44.49-70.10) |
|                                      | 90+            | 15                        | 48.39 (29.17-80.27)    | 29.64 (13.90-45.37)   | 2                         | 6.45 (1.61-25.80)   | 3.38 (0.00-7.90)    | 7                         | 22.58 (10.77-47.37) | 33.83 (0.96-66.69)  |
| <b>Townsend deprivation quintile</b> | 1 – least      | 269                       | 36.43 (32.33-41.05)    | 38.15 (32.99-43.30)   | 13                        | 10.23 (5.94-17.61)  | 9.84 (6.14-13.53)   | 233                       | 31.56 (27.75-35.88) | 31.40 (26.79-36.00) |
|                                      | 2              | 295                       | 43.15 (38.50-48.36)    | 38.99 (34.48-43.51)   | 88                        | 11.92 (9.67-14.69)  | 12.77 (5.17-20.37)  | 261                       | 38.18 (33.81-43.10) | 35.87 (31.40-40.34) |
|                                      | 3              | 268                       | 39.24 (34.82-44.24)    | 38.92 (34.29-43.56)   | 83                        | 12.14 (9.79-15.05)  | 10.33 (8.03-12.64)  | 247                       | 36.17 (31.93-40.97) | 36.30 (31.77-40.83) |
|                                      | 4              | 256                       | 41.82 (37.00-47.27)    | 42.38 (37.10-47.66)   | 70                        | 10.25 (8.11-12.96)  | 11.07 (8.57-13.56)  | 189                       | 30.87 (26.77-35.61) | 32.09 (27.41-36.78) |
|                                      | 5 – most       | 175                       | 40.28 (34.74-46.72)    | 42.09 (34.83-49.35)   | 64                        | 10.45 (8.18-13.36)  | 10.19 (7.80-12.58)  | 156                       | 35.91 (30.69-42.01) | 37.31 (30.60-44.00) |
|                                      | Missing        | 36                        | 28.32 (20.43-39.27)    | 34.23 (22.82-45.63)   | 35                        | 8.06 (5.78-11.22)   | 11.26 (8.44-14.08)  | 30                        | 23.60 (16.50-33.76) | 27.27 (16.52-38.03) |
| <b>Smoking</b>                       | current smoker | 347                       | 55.50 (49.96-61.66)    | 48.60 (43.04-54.15)   | 41                        | 6.56 (4.83-8.91)    | 5.27 (3.54-7.00)    | 273                       | 43.67 (38.78-49.17) | 40.01 (34.37-45.66) |
|                                      | ex-smoker      | 351                       | 78.66 (70.85-87.34)    | 52.55 (46.96-58.13)   | 60                        | 13.45 (10.44-17.32) | 8.49 (6.19-10.80)   | 234                       | 52.44 (46.14-59.61) | 36.33 (31.46-41.21) |
|                                      | never smoked   | 596                       | 36.99 (34.13-40.08)    | 31.43 (28.89-33.97)   | 247                       | 15.33 (13.53-17.36) | 14.13 (12.34-15.93) | 595                       | 36.92 (34.07-40.01) | 32.73 (29.91-35.57) |
|                                      | Missing        | 5                         | 0.84 (0.35-2.02)       | 10.69 (0.61-20.77)    | 5                         | 0.84 (0.35-2.02)    | 3.92 (0.00-8.14)    | 14                        | 2.35 (1.39-3.97)    | 23.31 (8.09-38.55)  |
| <b>Ethnicity</b>                     | Asian          | 13                        | 15.34 (8.91-26.41)     | -                     | 9                         | 10.62 (5.53-20.41)  | -                   | 17                        | 20.06 (12.47-32.26) | -                   |
|                                      | Black          | 5                         | 11.31 (4.71-27.16)     | -                     | 4                         | 9.04 (3.89-24.10)   | -                   | 16                        | 36.18 (22.16-59.05) | -                   |
|                                      | Mixed          | 2                         | 10.80 (2.70-43.19)     | -                     | 1                         | 5.40 (0.76-38.34)   | -                   | 3                         | 16.20 (5.23-50.24)  | -                   |
|                                      | Other          | 2                         | 11.36 (2.84-45.41)     | -                     | 2                         | 11.36 (2.84-45.41)  | -                   | 4                         | 22.72 (8.53-60.52)  | -                   |
|                                      | White          | 590                       | 41.37 (38.16-44.85)    | -                     | 141                       | 9.89 (8.38-11.66)   | -                   | 502                       | 35.20 (32.25-38.42) | -                   |
|                                      | Missing        | 687                       | 40.71 (37.78-43.87)    | -                     | 196                       | 11.62 (10.10-13.36) | -                   | 574                       | 34.02 (31.34-36.92) | -                   |

Table S3: Prevalence of primary biliary cholangitis (PBC), primary sclerosing cholangitis (PSC), and autoimmune hepatitis (AIH) for 2015. ‘Adjusted’ figures are adjusted for one or all of latitude, sex, age, Townsend deprivation quintile, and smoking status by direct standardisation as appropriate. Figures are per 100 000 population with 95% confidence intervals.

| Year | PBC n | PBC incidence    | PSC n | PSC incidence    | AIH n | AIH incidence    |
|------|-------|------------------|-------|------------------|-------|------------------|
| 2002 | 68    | 2.64 (2.08-3.35) | 19    | 0.74 (0.47-1.16) | 34    | 1.32 (0.94-1.85) |
| 2003 | 73    | 2.39 (1.90-3.01) | 25    | 0.82 (0.55-1.21) | 50    | 1.64 (1.24-2.16) |
| 2004 | 74    | 2.27 (1.81-2.85) | 26    | 0.80 (0.54-1.17) | 77    | 2.36 (1.89-2.96) |
| 2005 | 78    | 2.20 (1.76-2.75) | 25    | 0.71 (0.48-1.04) | 76    | 2.15 (1.71-2.69) |
| 2006 | 100   | 2.68 (2.21-3.26) | 28    | 0.75 (0.52-1.09) | 72    | 1.93 (1.53-2.43) |
| 2007 | 95    | 2.47 (2.02-3.02) | 28    | 0.73 (0.50-1.05) | 66    | 1.71 (1.35-2.18) |
| 2008 | 95    | 2.35 (1.92-2.87) | 26    | 0.64 (0.44-0.94) | 59    | 1.46 (1.13-1.88) |
| 2009 | 109   | 2.57 (2.13-3.10) | 35    | 0.83 (0.59-1.15) | 76    | 1.79 (1.43-2.24) |
| 2010 | 107   | 2.54 (2.10-3.07) | 31    | 0.74 (0.52-1.05) | 82    | 1.95 (1.57-2.42) |
| 2011 | 105   | 2.49 (2.06-3.01) | 35    | 0.83 (0.60-1.15) | 98    | 2.32 (1.91-2.83) |
| 2012 | 108   | 2.53 (2.10-3.06) | 24    | 0.56 (0.38-0.84) | 101   | 2.37 (1.95-2.88) |
| 2013 | 112   | 2.70 (2.25-3.25) | 29    | 0.70 (0.49-1.01) | 91    | 2.20 (1.79-2.70) |
| 2014 | 90    | 2.35 (1.91-2.89) | 33    | 0.86 (0.61-1.21) | 58    | 1.51 (1.17-1.96) |
| 2015 | 80    | 2.43 (1.95-3.03) | 25    | 0.76 (0.51-1.12) | 75    | 2.28 (1.82-2.86) |

Table S4: Incidence over time. Incident cases of autoimmune liver diseases are given per 100 000/year

| <b>Latitude</b> | <b>MS n</b> | <b>MS incidence</b> | <b>MS adj. incidence</b> | <b>HTN n</b> | <b>HTN incidence</b>         | <b>HTN adj incidence</b>     |
|-----------------|-------------|---------------------|--------------------------|--------------|------------------------------|------------------------------|
| 50°-            | 416         | 8.11 (7.37-8.93)    | 8.24 (7.40-9.07)         | 43003        | 997.75 (988.37-1,007.23)     | 830.12 (821.90-838.35)       |
| 51°-            | 1734        | 8.15 (7.78-8.54)    | 8.12 (7.73-8.50)         | 161303       | 876.25 (871.98-880.54)       | 928.56 (924.06-933.06)       |
| 52°-            | 714         | 8.86 (8.24-9.54)    | 8.90 (8.23-9.56)         | 67525        | 977.72 (970.37-985.12)       | 980.83 (973.43-988.24)       |
| 53°-            | 613         | 7.84 (7.24-8.49)    | 7.82 (7.19-8.44)         | 71343        | 1,069.49 (1,061.67-1,077.36) | 1,053.76 (1,046.09-1,061.42) |
| 54°-            | 352         | 9.83 (8.86-10.92)   | 10.35 (9.24-11.46)       | 30383        | 1,000.43 (989.24-1,011.74)   | 1,013.13 (1,001.58-1,024.68) |
| 55°-            | 414         | 11.06 (10.04-12.17) | 11.45 (10.21-12.69)      | 27812        | 863.80 (853.71-874.01)       | 902.11 (889.86-914.36)       |
| 56°-            | 218         | 14.51 (12.71-16.57) | 14.73 (12.62-16.84)      | 11557        | 910.42 (893.97-927.17)       | 851.28 (834.32-868.23)       |
| 57°-            | 244         | 13.82 (12.19-15.67) | 13.67 (11.86-15.48)      | 11619        | 768.37 (754.53-782.47)       | 710.22 (696.41-724.02)       |
| Missing         | 19          | 6.44 (4.10-10.09)   | 6.63 (3.43-9.83)         | 2084         | 824.58 (789.92-860.75)       | 874.39 (832.29-916.49)       |

Table S5: Incidence of multiple sclerosis and hypertension by latitude band. Incident cases are presented per 100 000/year

| <b>Latitude</b> | <b>PBC</b>   | <b>PSC</b>       | <b>AIH</b> |
|-----------------|--------------|------------------|------------|
| 50              | 65 (56-74)   | 62 (40-68)       | 62 (50-72) |
| 51              | 62 (53-73)   | 52.5 (40.5-68)   | 58 (43-69) |
| 52              | 63 (53-75)   | 60 (48-70)       | 60 (48-69) |
| 53              | 63 (52.5-71) | 59.5 (48.5-68.5) | 56 (41-67) |
| 54              | 62 (52-72)   | 45 (32-66)       | 58 (46-68) |
| 55              | 59 (51-68)   | 51 (25-66)       | 58 (41-70) |
| 56              | 65 (52-74)   | 45 (40-64)       | 54 (41-64) |
| 57              | 59 (51-68)   | 63.5 (47-77)     | 55 (44-67) |

Table S6: Age at disease incidence 2002-2016 by latitude band. Figures denote median age and interquartile range. For PBC, median age of incidence did not correlate with latitude at  $-0.48(-1.29-0.34)$  years/degree,  $r^2=0.254$ ,  $p=0.203$ ; For PSC, there was no significant change with latitude:  $-0.82(-3.74-2.11)$  years/degree,  $r^2=0.072$ ,  $p=0.521$ ; For AIH, incident cases were younger by  $-0.87(-1.489$  to  $-0.25)$  years/degree,  $r^2=0.663$ ,  $p=0.014$

| Latitude      | PBC men | PBC women | PSC men | PSC women | AIH men | AIH women |
|---------------|---------|-----------|---------|-----------|---------|-----------|
| 50°-          | 14      | 97        | 22      | 20        | 21      | 82        |
| 51°-          | 46      | 327       | 73      | 62        | 87      | 272       |
| 52°-          | 19      | 116       | 38      | 30        | 39      | 103       |
| 53°-          | 28      | 192       | 39      | 21        | 27      | 130       |
| 54°-          | 23      | 138       | 18      | 11        | 22      | 57        |
| 55°-          | 16      | 135       | 20      | 13        | 23      | 65        |
| 56°-          | 10      | 60        | 5       | 4         | 12      | 33        |
| 57°-          | 15      | 71        | 14      | 4         | 8       | 50        |
| Missing       | 2       | 5         | 1       | 1         | 2       | 1         |
| Chi-squared p |         | 0.894     |         | 0.547     |         | 0.196     |

Table S7: Sex distribution of incident diagnoses 2002-2016 by latitude band. The overall ratios of women:men were 6.6 for PBC, 0.7:1 for PSC, and 3.3:1 for AIH.

| Year    | PBC men | PBC women | PSC men | PSC women | AIH men | AIH women |
|---------|---------|-----------|---------|-----------|---------|-----------|
| 2002    | 12      | 56        | 4       | 30        | 4       | 30        |
| 2003    | 8       | 65        | 8       | 42        | 8       | 42        |
| 2004    | 7       | 67        | 20      | 57        | 20      | 57        |
| 2005    | 15      | 63        | 13      | 63        | 13      | 63        |
| 2006    | 14      | 86        | 21      | 51        | 21      | 51        |
| 2007    | 14      | 81        | 16      | 50        | 16      | 50        |
| 2008    | 7       | 88        | 16      | 43        | 16      | 43        |
| 2009    | 17      | 92        | 19      | 57        | 19      | 57        |
| 2010    | 11      | 96        | 23      | 59        | 23      | 59        |
| 2011    | 15      | 90        | 26      | 72        | 26      | 72        |
| 2012    | 13      | 95        | 17      | 84        | 17      | 84        |
| 2013    | 17      | 95        | 18      | 73        | 18      | 73        |
| 2014    | 10      | 80        | 13      | 45        | 13      | 45        |
| 2015    | 8       | 72        | 20      | 55        | 20      | 55        |
| 2016    | 5       | 15        | 18      | 7         | 7       | 12        |
| p-value |         | 0.673     |         | 0.879     |         | 0.341     |

Table S8: Sex ratios of incident cases over time. Chi-sq test for trend



| <b>Year</b> | <b>PBC</b>     | <b>PSC</b>       | <b>AIH</b>     |
|-------------|----------------|------------------|----------------|
| 2002        | 66.5 (53.5-73) | 57 (45-68)       | 52 (37-64)     |
| 2003        | 60 (52-69)     | 48 (39-62)       | 52.5 (35.5-68) |
| 2004        | 61 (52-70)     | 51 (40-61)       | 54 (43-62)     |
| 2005        | 61 (53-73)     | 58.5 (39.5-67.5) | 59 (40-72)     |
| 2006        | 60 (50-70)     | 46 (30-62)       | 52 (34-63)     |
| 2007        | 60 (52-70)     | 51.5 (43-61)     | 57 (40-69)     |
| 2008        | 60 (51-68)     | 53 (37-62)       | 54 (41-69)     |
| 2009        | 62 (49-71)     | 51 (29-67)       | 55 (31-67)     |
| 2010        | 64 (53-74)     | 56.5 (38-68.5)   | 56.5 (44.5-68) |
| 2011        | 60 (51.5-71.5) | 55 (25-70)       | 56 (40-67)     |
| 2012        | 62 (52-68)     | 48.5 (28-73)     | 59 (47.5-66)   |
| 2013        | 60.5 (52-71)   | 60.5 (45-68)     | 56.5 (42-68)   |
| 2014        | 59 (51-70)     | 60 (41-74)       | 58.5 (40-70)   |
| 2015        | 63 (49-71)     | 62 (55-69)       | 58.5 (38-66.5) |

Table S9: Age at disease incidence 2002-2016 by year of diagnosis for PBC, PSC, and AIH. Figures denote median age and interquartile range. For PBC, there was no significant change over time ( $-0.09(-0.39$  to  $0.21)$  years/year;  $r^2=0.033$ ,  $p=0.532$ ). For PSC, there was no significant change over time ( $0.59(-0.06$  to  $1.26)$  years/year;  $r^2=0.241$ ,  $p=0.074$ ). For AIH, there was a significant increase in age of incidence over time ( $0.42(0.15$  to  $0.70)$  years/year;  $r^2=0.483$ ,  $p=0.006$ ).
